# Supplementary material for: Ultra-low-dose coronary computed tomography angiography using photon-counting detector computed tomography
Source: PubMed Central journal article supplement — Eur Heart J Imaging Methods Pract. 2024 Nov 27;2(3):qyae125. doi: 10.1093/ehjimp/qyae125 (PMC11631184; doi:10.1093/ehjimp/qyae125), 2024-11-27
Supplement: qyae125_supplementary_data.pdf [file qyae125_supplementary_data.pdf]

| Patient No. | Age | Sex | Height (cm) | Weight (kg) | BMI (kg/m <sup>2</sup> ) | Mean heart rate (bpm) | Heart rate variability (bpm) | Amount of contrast(mL) | Flow rate (ml/s) | CTDIvol (mGy) | DLP (mGy · cm) | effective mAs |
|-------------|-----|-----|-------------|-------------|--------------------------|-----------------------|------------------------------|------------------------|------------------|---------------|----------------|---------------|
| 1           | 81  | m   | 160         | 69          | 27.0                     | 51                    | 50-51                        | 59                     | 4.9              | 1.69          | 28.9           | 128           |
| 2           | 69  | m   | 175         | 57          | 18.6                     | 64                    | 63-65                        | 59                     | 4.9              | 1.07          | 19.6           | 81            |
| 3           | 52  | f   | 159         | 48          | 19.0                     | 45                    | 45-46                        | 46                     | 3.9              | 1.02          | 18.6           | 77            |
| 4           | 83  | m   | 166         | 67          | 24.3                     | 50                    | 50-51                        | 38                     | 3.3              | 1.82          | 30.1           | 137           |
| 5           | 90  | m   | 160         | 60          | 23.4                     | 52                    | 52-53                        | 50                     | 4.2              | 1.85          | 35.2           | 139           |
| 6           | 84  | m   | 160         | 46          | 18.0                     | 54                    | 53-54                        | 44                     | 3.7              | 1.23          | 22             | 94            |
| 7           | 57  | f   | 162         | 51          | 19.4                     | 59                    | 59                           | 49                     | 4.1              | 1.03          | 17.3           | 78            |
| 8           | 48  | m   | 170         | 73          | 25.3                     | 62                    | 62-63                        | 60                     | 5                | 1.81          | 31.6           | 135           |
| 9           | 76  | m   | 158         | 70          | 28.0                     | 55                    | 55-56                        | 59                     | 4.9              | 2.02          | 31.7           | 151           |
| 10          | 82  | f   | 149         | 58          | 26.1                     | 52                    | 52-53                        | 56                     | 4.7              | 1.47          | 23.3           | 111           |
| 11          | 76  | m   | 173         | 60          | 20.0                     | 60                    | 59-61                        | 58                     | 4.8              | 1.14          | 19.3           | 85            |
| 12          | 80  | m   | 168         | 62          | 22.0                     | 56                    | 56                           | 58                     | 4.8              | 1.96          | 33.6           | 148           |
| 13          | 51  | f   | 163         | 48          | 18.1                     | 56                    | 55-57                        | 46                     | 3.9              | 0.98          | 18.5           | 75            |
| 14          | 81  | f   | 145         | 42          | 20.0                     | 64                    | 64                           | 35                     | 2.9              | 0.72          | 11             | 55            |
| 15          | 80  | m   | 161         | 60          | 23.1                     | 51                    | 51                           | 58                     | 4.8              | 1.73          | 28.7           | 130           |
| 16          | 62  | m   | 175         | 86          | 28.1                     | 62                    | 62                           | 60                     | 5                | 1.82          | 27.6           | 136           |
| 17          | 69  | m   | 160         | 61          | 23.8                     | 56                    | 56                           | 51                     | 4.2              | 1.97          | 32.6           | 148           |
| 18          | 70  | m   | 164         | 64          | 23.8                     | 58                    | 58-59                        | 54                     | 4.5              | 1.94          | 31.8           | 146           |
| 19          | 73  | m   | 169         | 55          | 19.3                     | 50                    | 49-50                        | 53                     | 4.4              | 1.95          | 32.1           | 147           |
| 20          | 81  | f   | 150         | 50          | 22.2                     | 64                    | 64-65                        | 48                     | 4                | 1.99          | 34.4           | 148           |
| 21          | 71  | m   | 164         | 66          | 24.5                     | 58                    | 58                           | 55                     | 4.6              | 1.94          | 32.5           | 144           |
| 22          | 53  | f   | 162         | 56          | 21.3                     | 64                    | 64                           | 67                     | 4.5              | 1.97          | 37.9           | 148           |
| 23          | 86  | m   | 165         | 50          | 18.4                     | 52                    | 50-53                        | 48                     | 4                | 1.91          | 35.2           | 144           |
| 24          | 71  | f   | 163         | 64          | 24.1                     | 48                    | 47-48                        | 54                     | 4.5              | 2.06          | 35.1           | 155           |
| 25          | 70  | m   | 163         | 65          | 24.5                     | 57                    | 57                           | 54                     | 4.5              | 1.96          | 30.5           | 148           |
| 26          | 72  | f   | 151         | 53          | 23.2                     | 45                    | 45                           | 51                     | 4.3              | 1.98          | 31.8           | 147           |
| 27          | 79  | f   | 150         | 41          | 18.2                     | 62                    | 62-63                        | 40                     | 3.3              | 1.61          | 23.9           | 122           |
| 28          | 79  | f   | 152         | 50          | 21.6                     | 58                    | 58-59                        | 48                     | 4                | 1.6           | 25.4           | 122           |
| 29          | 85  | m   | 162         | 57          | 21.5                     | 62                    | 61-62                        | 55                     | 4.6              | 1.95          | 35.2           | 147           |
| 30          | 64  | f   | 152         | 61          | 26.4                     | 52                    | 51-52                        | 51                     | 4.2              | 2.13          | 34.8           | 157           |
| 31          | 82  | m   | 165         | 65          | 23.9                     | 52                    | 52-53                        | 54                     | 4.5              | 1.93          | 33.1           | 144           |
| 32          | 51  | f   | 152         | 51          | 22.1                     | 62                    | 62                           | 43                     | 3.5              | 0.92          | 14.4           | 68            |
| 33          | 53  | m   | 165         | 70          | 25.7                     | 54                    | 54-55                        | 59                     | 4.9              | 2.03          | 34.6           | 153           |
| 34          | 66  | m   | 168         | 73          | 25.9                     | 50                    | 50                           | 61                     | 5.1              | 1.94          | 32             | 148           |
| 35          | 74  | m   | 161         | 51          | 19.7                     | 59                    | 59                           | 49                     | 4.1              | 1.76          | 31.6           | 133           |
| 36          | 90  | m   | 159         | 59          | 23.3                     | 59                    | 59                           | 49                     | 4.1              | 1.95          | 34.5           | 148           |
| 37          | 80  | f   | 149         | 50          | 22.7                     | 64                    | 62-67                        | 48                     | 4                | 2.05          | 36.2           | 153           |
| 38          | 76  | m   | 163         | 48          | 17.8                     | 58                    | 57-58                        | 46                     | 3.9              | 1.99          | 38.4           | 148           |
| 39          | 79  | m   | 158         | 47          | 18.6                     | 59                    | 59                           | 37                     | 3                | 1.88          | 30.1           | 141           |
| 40          | 90  | m   | 150         | 56          | 25.1                     | 54                    | 53-54                        | 47                     | 3.9              | 1.85          | 30.1           | 139           |
